# Supplementary material for: Synthesis of a novel bifunctional nanocomposite with tunable upconversion emission and magnetic properties
Source: Royal Society of Chemistry journal article supplement (doi:10.1039/c5ra21721k), 2015-01-01
Supplement: c5ra21721k1.pdf [file c5ra21721k1.pdf]

## Supporting Information

# Synthesis of a novel bifunctional nanocomposite with tunable upconversion emission and magnetic properties

**Qian Cheng,<sup>a,b</sup> Yu Li<sup>c</sup>, Shouxin Liu<sup>a\*</sup>, Jiehe Sui<sup>b</sup> and Wei Cai<sup>b</sup>**

<sup>a</sup> School of Materials Science and Engineering, Northeast Forestry University, Harbin 150040, PR China

<sup>b</sup> National Key laboratory of Materials Behaviours & Evaluation Technology in Space Environments, Harbin Institute of Technology, Harbin, 150001, PR China.

<sup>c</sup> College of Science, Northeast Forestry University, Harbin 150040, P. R. China

*\*To whom correspondence should be addressed. E-mail: liushouxin@126.com; Tel: (+86)451-8219-1502; Fax: (+86)451-8219-1506*

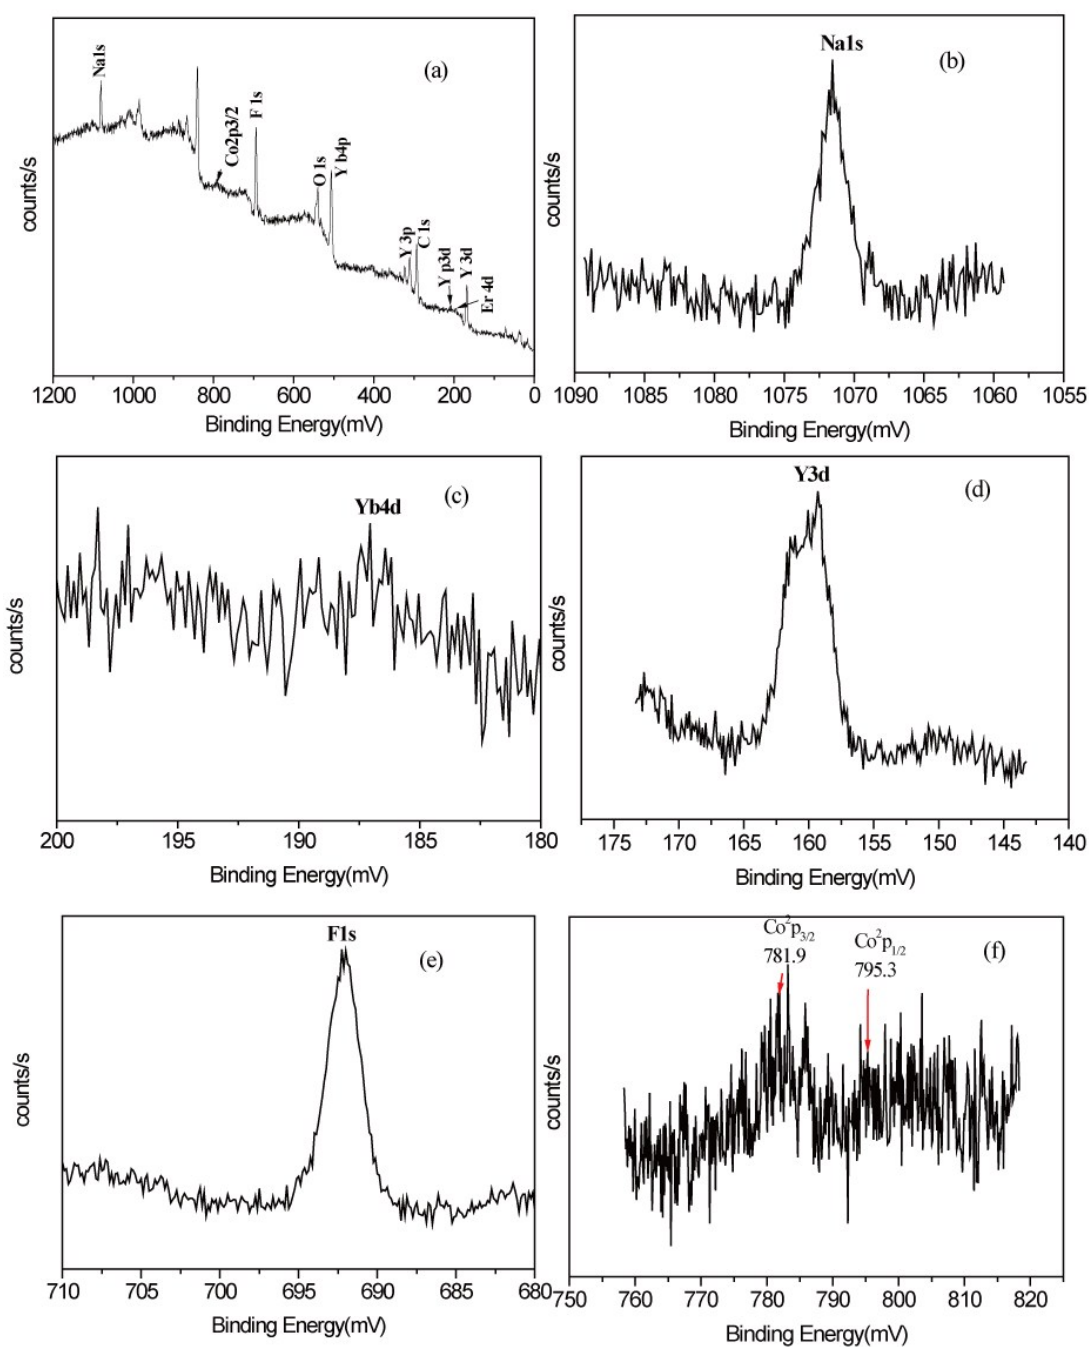

Fig.S1. (a) XPS spectrum of 30 mol%  $\text{Co}^{2+}$ -doped  $\text{NaYF}_4: \text{Yb}^{3+}/\text{Er}^{3+}$  (20/2 mol%); (b), (c), (d), (e), (f) The expanded spectrum of Na 1s, Yb4d, Y3d, F1s and Co 2p. The Co 2p<sub>1/2</sub> and 2p<sub>3/2</sub> signals are located at 789.0 and 795.3 eV, respectively. These values agree well with literature values of  $\text{Co}^{2+}$  ions

To confirm further the chemical bonding states of Co ions in the doped

NaYF<sub>4</sub>:Yb<sup>3+</sup>/Er<sup>3+</sup> NPs, X-Ray photoelectron spectroscopy (XPS) measurements were carried out on the sample with 30 mol% Co<sup>2+</sup> ions codoping. The XPS survey spectrum (Fig.S1.a) shows the presence of Na, Y, F, Yb, Er and Co elements. Fig.S1.f shows the high resolution Co 2p spectrum of 30 mol% Co codoping in NaYF<sub>4</sub> Yb<sup>3+</sup>/Er<sup>3+</sup> sample. There are two main peaks, positioned at the binding energy sites of 781.9 eV and 795.3 eV, corresponding to the Co <sup>2</sup>p<sub>3/2</sub> and Co <sup>2</sup>p<sub>1/2</sub> orbitals, respectively. A report state that the Co <sup>2</sup>p<sub>3/2</sub> peak corresponding to the Co-Co bonding was located at 778.1-778.3 eV, and the peak corresponding to the Co-F bonding was located around 780eV. Therefore, Co ions, in the +2 oxidation state, are surrounded by F ions, that is, Co<sup>2+</sup> successfully substituted for Y<sup>3+</sup> in the NaYF<sub>4</sub> lattice<sup>1</sup> In addition, it can be seen that the binding energy (calibrated using C 1s (284.7 eV) as the reference) of Y (Y3p3/2, 316 eV; Y3p3/2, 304 eV; 3d5/2, 159.6 eV), Na (1s, 1074 eV), F(1s, 692 eV), Yb (4d, 196 eV) and Er (4d, 176 eV) are obvious (the C signal is due to the carbon used as reference). In Fig.S1. (a), there are one peak positioned at the binding energy sites of 538.8 eV, corresponding to the O in the OA on the surface of the nanoparticles.

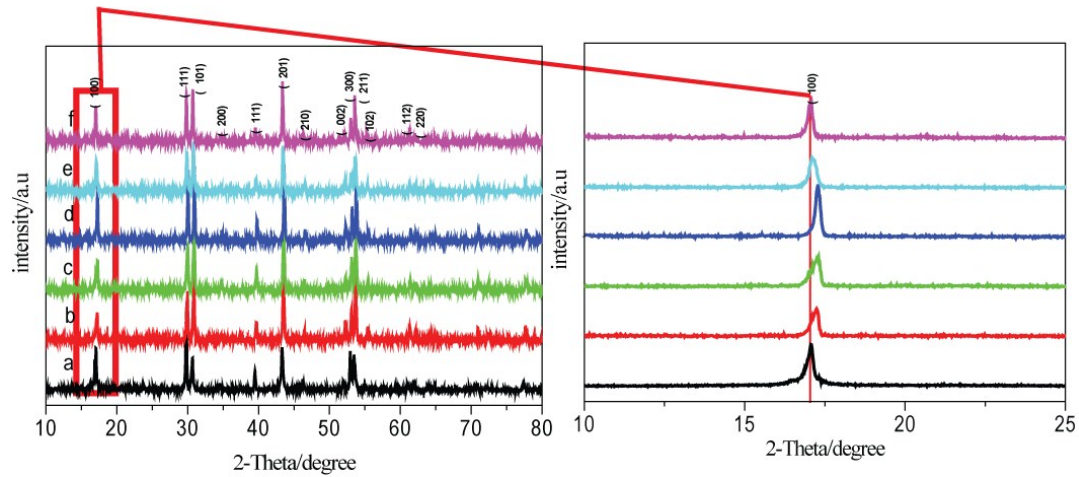

Fig.S2. XRD patterns of NaYF<sub>4</sub> samples codoped with different Co<sup>2+</sup> ions concentration: (a) 0%, (b) 5%, (c) 10%, (d) 15% (e) 20% and (f) 30%.

Fig.S2. shows that Co<sup>2+</sup> ions codoping do not induce the hexagonal phase transformation. The pure hexagonal NaYF<sub>4</sub> NPs were obtained even the Co<sup>2+</sup> ions concentration increased to 30 mol%, indicating all the Co<sup>2+</sup> ions were incorporated into the host matrix and formed a Y-Co solid solution structure. The enlarged area shows that all the diffraction peaks (100) shift slightly to larger angles for Co<sup>2+</sup> ion concentration of 0-15 mol%, then gradually move reversely for Co<sup>2+</sup> ion concentration of 15-30 mol% as a result of changing the unit-cell volume due to the substitution or occupation of Y<sup>3+</sup> ions by small Co<sup>2+</sup> ions in the host lattice.

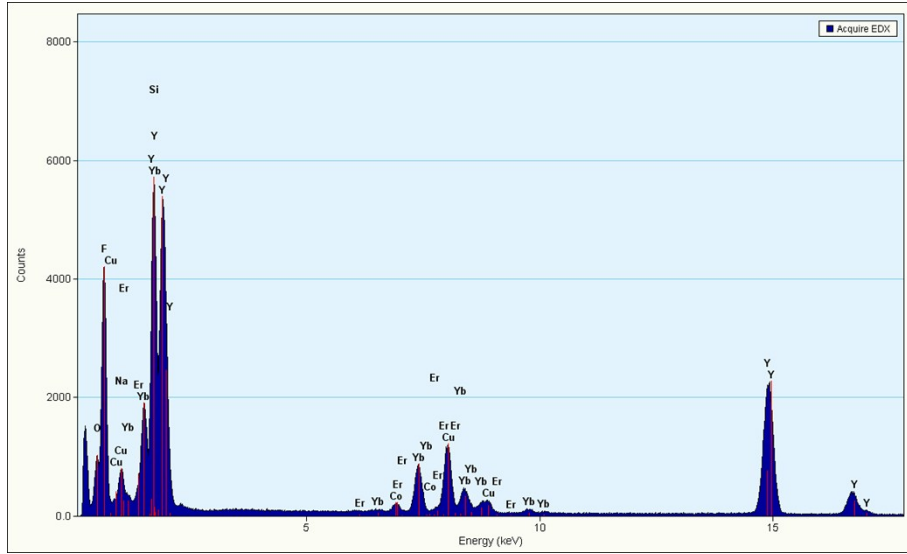

Fig.S3. EDX pattern of the 30 mol%  $\text{Co}^{2+}$ -doped  $\text{NaYF}_4: \text{Yb}^{3+}/\text{Er}^{3+}$  NPs reveal the existence of the dopant elemental Co.

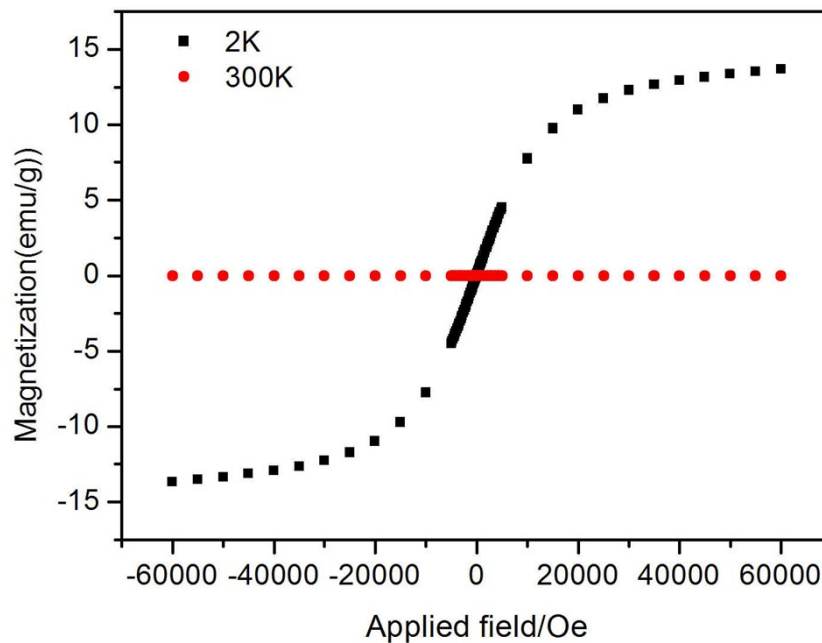

Fig.S4.  $M(H)$  measurements at 2 and 300K of 30 mol% Co-doped  $\text{NaYF}_4: \text{Yb}^{3+}/\text{Er}^{3+}$  NPs.

Fig.S4 shows the  $M(H)$  measurements at 2 and 300K of 30 mol% Co-doped  $\text{NaYF}_4: \text{Yb}^{3+}/\text{Er}^{3+}$  NPs. Typical superparamagnetism behavior is observed at 2K due to the absence of remanence ( $M_r$ ) or coercivity ( $H_c$ ), and the saturation magnetization ( $M_s$ ) is approximately 13.77 emu/g for the sample of 30%  $\text{Co}^{2+}$  doped  $\text{NaYF}_4: \text{Yb}^{3+}/\text{Er}^{3+}$

NPs. However, all the samples shows a purely paramagnetic behavior at room temperature, indicating that the Curie temperature ( $T_c$ ) is below 300K.<sup>2</sup>

## **Notes and references:**

- 1.H. J. Hao, M. Qin and P. Li, *J Alloy Compd*, 2012, **515**, 143.
2. D. Santos and M. A. Macedo, *Physica B*, 2012, **407**, 3229.
